# Supplementary material for: Ecological Risk, Input Flux, and Source of Heavy Metals in the Agricultural Plain of Hebei Province, China
Source: MDPI journal article supplement (doi:10.3390/ijerph19042288), 2022-02-17
Supplement: s1 [file s1]

# Ecological Risk, Input Flux, and Source of Heavy Metals in Agricultural Plain in Hebei Province, China

TableS1 Correlation analysis of trace elements in the all area by the Pearson method

| Heavy metals | As      | Cu      | Pb      | Cd      | Ni      | Cr      | Hg      | Zn      |
|--------------|---------|---------|---------|---------|---------|---------|---------|---------|
| As           | 1       | 0.550** | 0.414** | 0.289** | 0.671** | 0.513** | 0.059   | 0.259** |
| Cu           | 0.550** | 1       | 0.687** | 0.644** | 0.451** | 0.388** | 0.260** | 0.396** |
| Pb           | 0.414** | 0.687** | 1       | 0.561** | 0.334** | 0.310** | 0.226** | 0.388** |
| Cd           | 0.289** | 0.644** | 0.561** | 1       | 0.116   | 0.080   | 0.148*  | 0.879** |
| Ni           | 0.671** | 0.451** | 0.334** | 0.116   | 1       | 0.869** | 0.090   | 0.261** |
| Cr           | 0.513** | 0.388** | 0.310** | 0.080   | 0.869** | 1       | 0.224** | 0.216** |
| Hg           | 0.059   | 0.260** | 0.226** | 0.148*  | 0.090   | 0.224** | 1       | 0.135*  |
| Zn           | 0.259** | 0.396** | 0.388** | 0.879** | 0.261** | 0.216** | 0.135*  | 1       |

\*\* . Correlation is significant at the 0.01 level (2-tailed).

\* . Correlation is significant at the 0.05 level (2-tailed).

Table S2. Rotated component matrix.<sup>a</sup>

| Elements      | Extraction | Component |        |        |        |
|---------------|------------|-----------|--------|--------|--------|
|               |            | 1         | 2      | 3      | 4      |
| As            | 0.726      | 0.661     | 0.510  | 0.076  | -0.154 |
| Cu            | 0.845      | 0.284     | 0.819  | 0.278  | 0.131  |
| Pb            | 0.80       | 0.147     | 0.841  | 0.233  | 0.130  |
| Cd            | 0.978      | -0.031    | 0.470  | 0.869  | 0.037  |
| Ni            | 0.943      | 0.950     | 0.183  | 0.080  | 0.001  |
| Cr            | 0.897      | 0.920     | 0.089  | 0.061  | 0.198  |
| Hg            | 0.969      | 0.070     | 0.138  | 0.055  | 0.971  |
| Zn            | 0.982      | 0.165     | 0.127  | 0.968  | 0.048  |
| Total         |            | 2.321     | 1.935  | 1.841  | 1.043  |
| % of Variance |            | 29.011    | 24.194 | 23.014 | 13.041 |
| Cumulative %  |            | 29.011    | 53.205 | 76.219 | 89.260 |

Extraction Method: Principal Component Analysis.

Rotation Method: Varimax with Kaiser Normalization.

a. Rotation converged in 5 iterations.

TableS3 The mean values of Heavy metals in chemical fertilizers, irrigation  
water and atmospheric deposition (mg/kg)

| type                    |                                   | As     | Cd     | Cr     | Cu     | Hg    | Ni     | Pb     | Zn      |
|-------------------------|-----------------------------------|--------|--------|--------|--------|-------|--------|--------|---------|
| Chemical<br>fertilizers | compound<br>fertilizer            | 2.59   | 0.67   | 11.51  | 3.90   | 0.041 | 6.05   | 3.63   | 41.78   |
|                         | Urea                              | 0.80   | 0.04   | 1.16   | 0.10   | 0.005 | 1.05   | 0.51   | 1.01    |
|                         | ammonium<br>hydrogen<br>carbonate | 0.74   | 0.020  | 2.90   | 0.40   | 0.005 | 3.26   | 0.020  | 1.95    |
|                         | phosphate<br>fertilizer           | 9.08   | 0.58   | 9.49   | 10.6   | 0.040 | 6.98   | 2.33   | 44.7    |
| Irrigation water(mg/L)  |                                   | 0.0029 | 0.0008 | 0.0027 | 0.0029 | —     | 0.0056 | 0.0102 | 0.0088  |
| Atmospheric deposition  |                                   | 13.36  | 4.93   | 65.95  | 57.68  | 0.31  | 30.89  | 141.96 | 1263.64 |
